# Supplementary material
Source: PubMed Central journal article supplement (PMC3123872)

Figure S2

A.

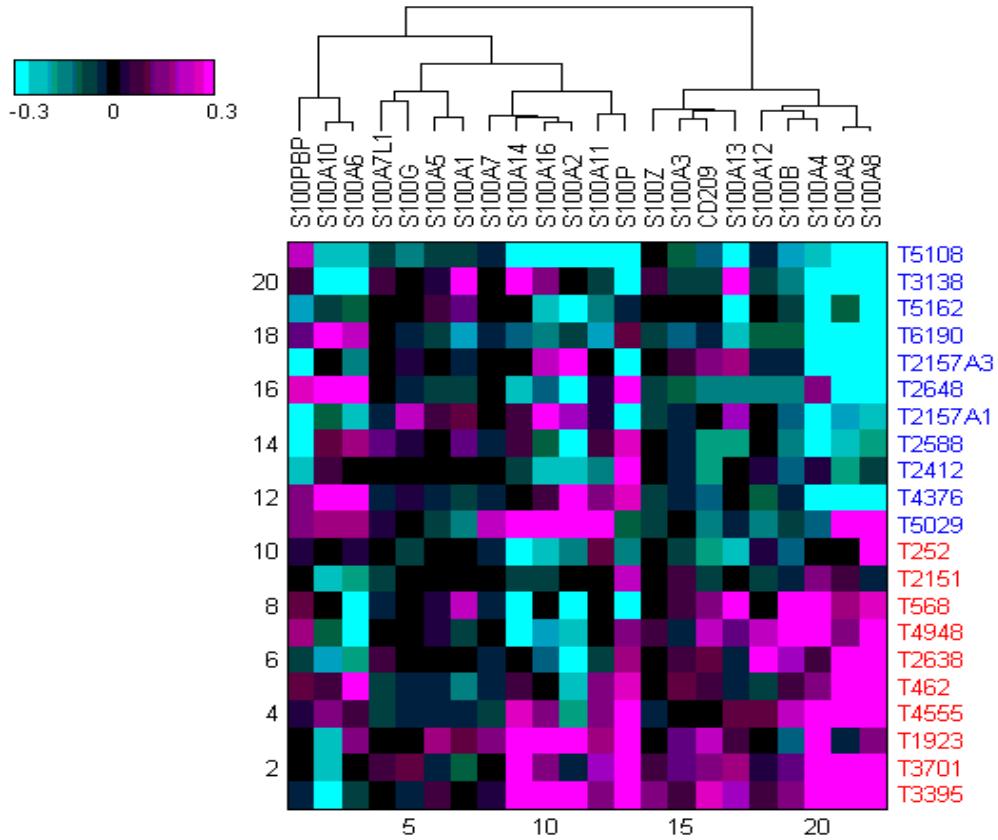

B.

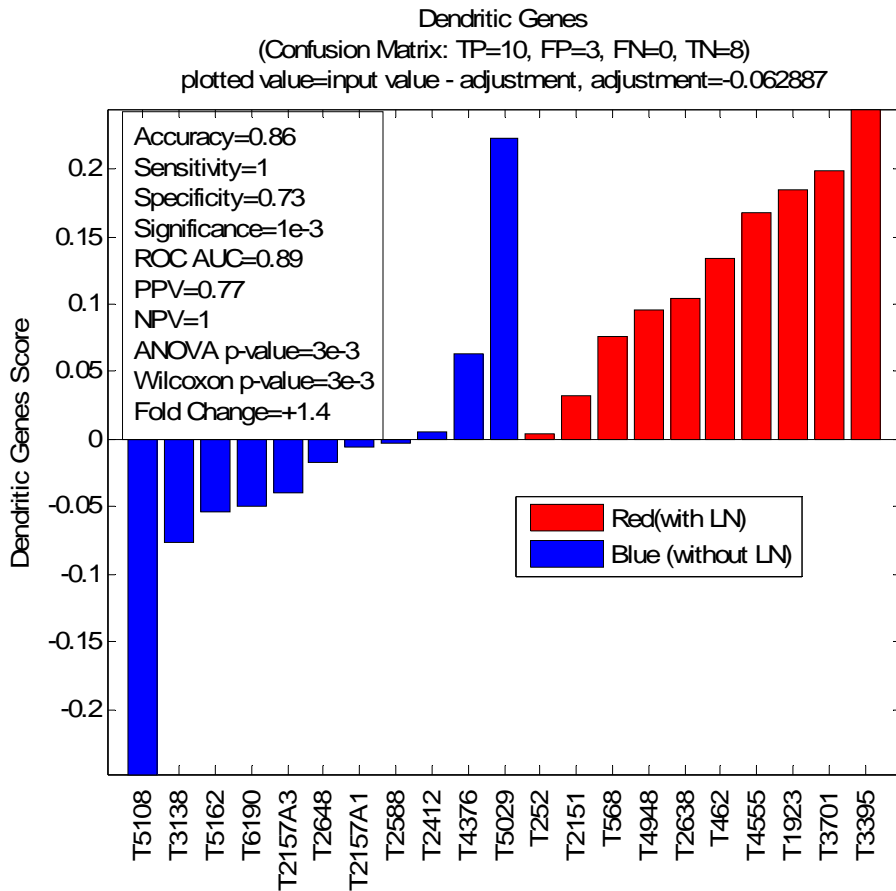

Supplement: mmc2.pdf [file mmc2.pdf]
